# Supplementary material
Source: PubMed Central journal article supplement (PMC3494912)
Supplement: 1212294109_pnas.201212294SI.pdf [file 1212294109_pnas.201212294SI.pdf]

# Supporting Information

Abe et al. 10.1073/pnas.1212294109

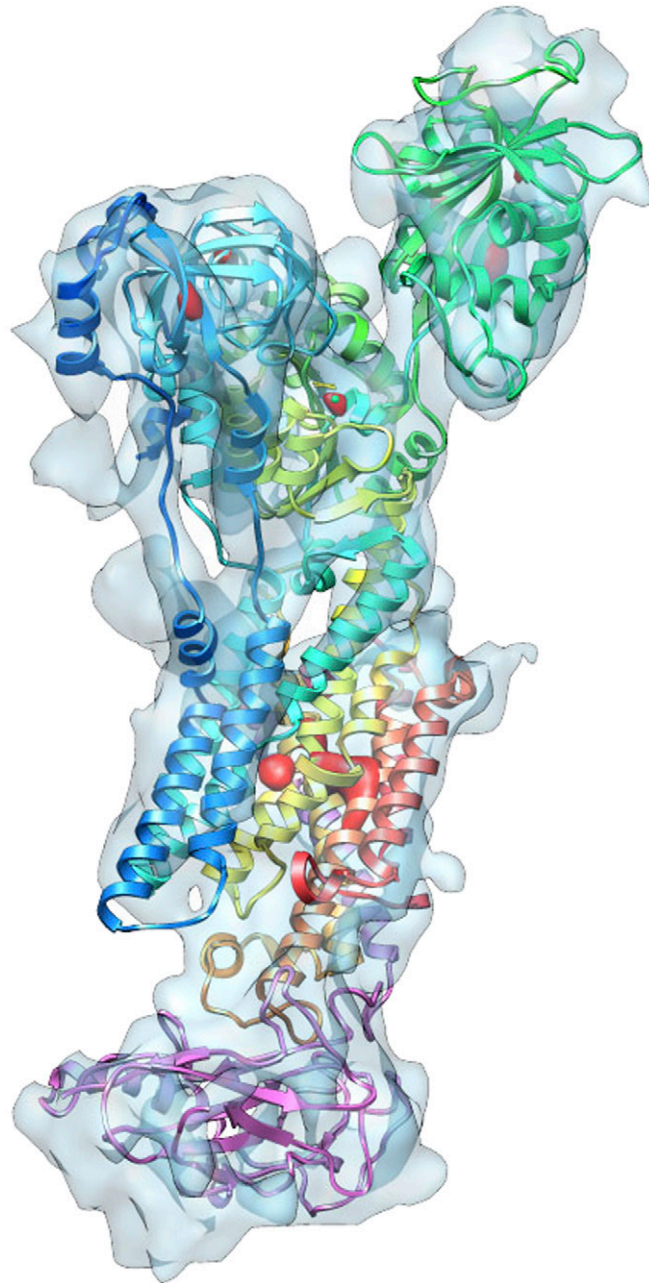

**Movie S1.** Cryo-EM structure of  $H^+,K^+$ -ATPase in  $(Rb^+)E2\sim A1F$  state. Molecular surface shows the EM map of  $(Rb^+)E2\sim A1F$  at  $1\ \sigma$  (A domain, blue; P domain, green; N domain, orange; TM, light blue;  $\beta$ -subunit, pink) and  $5\ \sigma$  (red), with superimposed homology model [color for TM helices (M1–M10) gradually changes from blue to red].

[Movie S1](#)

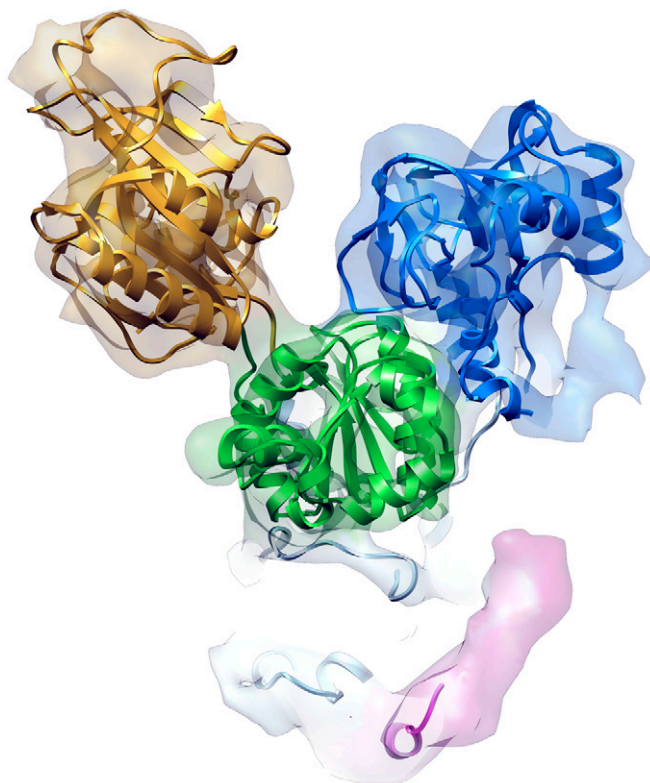

**Movie S2.** Rb<sup>+</sup>-induced rearrangement of the cytoplasmic domains. Sequential appearance of E2~AIF (dark colors) and (Rb<sup>+</sup>)E2~AIF (light colors) shows Rb<sup>+</sup>-induced movement of A and N domains relative to the P domain. Structures were viewed from the same direction as in Fig. 7C.

[Movie S2](#)

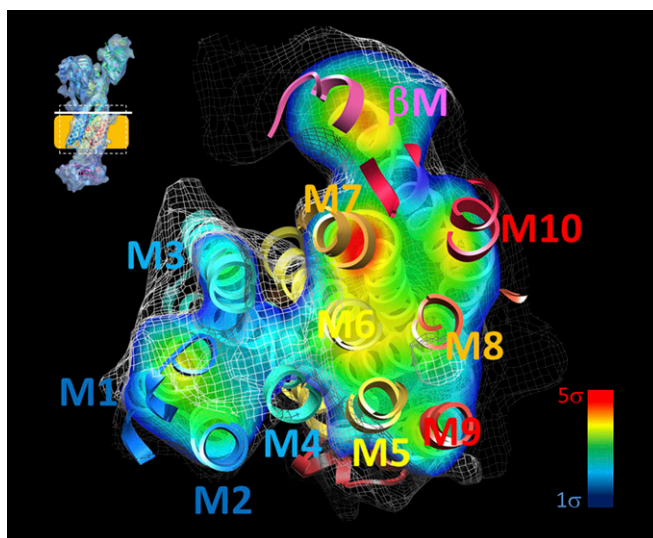

**Movie S3.** Horizontal sections throughout the TM region of (Rb<sup>+</sup>)E2~AIF. Cross-sections of the TM region (as shown in Fig. S8) are sequentially displayed. Positions are indicated in the upper left. Color codes are as in Fig. S8.

[Movie S3](#)

## Other Supporting Information Files

[SI Appendix \(PDF\)](#)
